# Supplementary material
Source: PubMed Central journal article supplement (PMC6792125)
Supplement: djz100_supplementary_data.pdf [file djz100_supplementary_data.pdf]

## Supplementary Materials

### Supplementary Tables

**Supplementary Table 1. List of domain names and synonyms\***

| <b>Domain</b>                   | <b>Synonyms (References)</b>                                                                                                                 |
|---------------------------------|----------------------------------------------------------------------------------------------------------------------------------------------|
| Attention                       | Attention (1, 2, 5,6); Orientation and Attention (3); Attention and Concentration (4); Simple Attention (7)                                  |
| Executive Function              | Executive Function (2-6)                                                                                                                     |
| Processing Speed                | Information Processing (1, 5); Information Processing Speed (4); Processing Speed (6); Speed of Processing (7)                               |
| Visuospatial Processing         | Visuospatial Skill (1, 4); Spatial Ability (2); Construction (3); Visuospatial Ability (5); Visuospatial Function (6); Spatial Abilities (7) |
| Language                        | Language (2, 4, 6, 7); Verbal Functions & Language Skills (3); Verbal Ability (5)                                                            |
| Motor Function                  | Psychomotor Skill (1); Motor Function (2, 4, 6); Motor Speed (5); Motor Abilities (7)                                                        |
| Concept Formation and Reasoning | Concept Formation and Reasoning (3)                                                                                                          |
| Perception                      | Perception (3)                                                                                                                               |
| Memory                          | Memory (2, 3)                                                                                                                                |
| Verbal Memory                   | Verbal Memory (1, 4, 5)                                                                                                                      |
| Visual Memory                   | Visuospatial Memory (1); Visual Memory (4, 5)                                                                                                |
| Long Term Memory                | Long-Term Memory (6, 7)                                                                                                                      |
| Short Term Memory               | Short-Term Memory (6, 7)                                                                                                                     |
| Working Memory                  | Working Memory (7)                                                                                                                           |

\*Each row indicates the domain names we use in this paper (left-hand column), with the corresponding synonyms from prior meta-analyses (right-hand column). The citation numbers correspond to the Reference List below.

## References

1. Anderson-Hanley C, Sherman ML, Riggs R, Agocha VB, Compas BE. Neuropsychological effects of treatments for adults with cancer: a meta-analysis and review of the literature. *J Int Neuropsychol Soc.* 2003;9(7):967-982.
2. Falletti MG, Sanfilippo A, Maruff P, Weih L, Phillips K-A. The nature and severity of cognitive impairment associated with adjuvant chemotherapy in women with breast cancer: A meta-analysis of the current literature. *Brain Cogn.* 2005;59(1):60-70.  
doi:10.1016/j.bandc.2005.05.001
3. Hodgson KD, Hutchinson AD, Wilson CJ, Nettelbeck T. A meta-analysis of the effects of chemotherapy on cognition in patients with cancer. *Cancer Treat Rev.* 2013;39(3):297-304. doi:10.1016/j.ctrv.2012.11.001
4. Jansen CE, Miaskowski C, Dodd M, Dowling G, Kramer J. A metaanalysis of studies of the effects of cancer chemotherapy on various domains of cognitive function. *Cancer.* 2005;104(10):2222-2233. doi:10.1002/cncr.21469
5. Jim HSL, Phillips KM, Chait S, et al. Meta-Analysis of Cognitive Functioning in Breast Cancer Survivors Previously Treated With Standard-Dose Chemotherapy. *J Clin Oncol.* 2012;30(29):3578-3587. doi:10.1200/JCO.2011.39.5640

6. Ono M, Ogilvie JM, Wilson JS, et al. A meta-analysis of cognitive impairment and decline associated with adjuvant chemotherapy in women with breast cancer. *Front Oncol.* 2015;5(59):1-19. doi:10.3389/fonc.2015.00059
7. Stewart A, Bielajew C, Collins B, Parkinson M, Tomiak E. A Meta-Analysis of the Neuropsychological Effects of Adjuvant Chemotherapy Treatment in Women Treated for Breast Cancer. *Clin Neuropsychol.* 2006;20(1):76-89. doi:10.1080/138540491005875

**Supplementary Table 2. List of all tests from the meta-analyses, categorized by domain, with total number of individual effect sizes in that domain.**

| Tests by domain                                                                    | Total No. of Individual Effect Sizes |
|------------------------------------------------------------------------------------|--------------------------------------|
| Attention                                                                          |                                      |
| Trail Making Test (TMT) - A                                                        | 65                                   |
| Digit Span - Forwards                                                              | 60                                   |
| Digit Span - Backwards                                                             | 53                                   |
| Digit Symbol                                                                       | 21                                   |
| Spatial Span - Forwards                                                            | 14                                   |
| Spatial Span - Backwards                                                           | 12                                   |
| Arithmetic                                                                         | 11                                   |
| Paced Auditory Serial Addition Test (PASAT)                                        | 10                                   |
| D2 Test                                                                            | 9                                    |
| Letter Number Sequencing                                                           | 9                                    |
| Trail Making Test (TMT) - B                                                        | 9                                    |
| Continuous Performance Test (CPT) - Vigilance (# of targets correct)               | 6                                    |
| Stroop Test - Interference (Color - Word Card; Card 3)                             | 5                                    |
| Continuous Performance Test (CPT) - Vigilance (reaction time)                      | 5                                    |
| Continuous Performance Test (CPT) - Distractibility (# of targets correct)         | 5                                    |
| Continuous Performance Test (CPT) - Distractibility (reaction time)                | 4                                    |
| High Sensitivity Cognitive Screen (HSCS) - Attention                               | 3                                    |
| Fepsy Visual Reaction - Non-Dominant                                               | 3                                    |
| Symbol Search                                                                      | 3                                    |
| Fepsy Visual Reaction - Dominant                                                   | 3                                    |
| Fepsy Binary Choice                                                                | 3                                    |
| Fepsy Visual Searching                                                             | 3                                    |
| California Computerized Assessment Package (CalCAP) - Complex Choice Reaction Time | 2                                    |

|                                                                                        |     |
|----------------------------------------------------------------------------------------|-----|
| Stroop Test - (Word Card/Card 1)                                                       | 2   |
| Repeatable Battery for the Assessment of Neuropsychological Status (RBANS) - Attention | 3   |
| California Computerized Assessment Package (CalCAP) - Accuracy                         | 2   |
| Test of Attentional Performance (TAP) - Alertness (phasic alertness)                   | 2   |
| Attention Index (WMS-R)                                                                | 2   |
| Dementia Rating Scale (DRS) - Attention                                                | 2   |
| California Computerized Assessment Package (CalCAP) - Simple Reaction Time             | 2   |
| Test of Attentional Performance (TAP) - Go/No Go                                       | 1   |
| Road Sign Test (RST)                                                                   | 1   |
| Timed Instrumental Activities of Daily Living (TIADL)                                  | 1   |
| CNS- Vital Signs - Flexibility                                                         | 1   |
| Booklet Category Test                                                                  | 1   |
| CNS- Vital Signs - Working Memory                                                      | 1   |
| Test of Everyday Attention (TEA) - Telephone Search                                    | 1   |
| Consonant Trigrams Test                                                                | 1   |
| Intradimensional/Extradimensional Shift Task (IED)                                     | 1   |
| Alphabetic Cross Out Test                                                              | 1   |
| Ruff 2 & 7 Selective Attention Test                                                    | 1   |
| Connor's CPT                                                                           | 1   |
| Stroop Test - (Color Card/Card 2)                                                      | 1   |
| Test of Everyday Attention (TEA) - Auditory Elevator                                   | 1   |
| Eriksen Flanker Task                                                                   | 1   |
| Test of Everyday Attention (TEA) - Visual Elevator                                     | 1   |
| Automated Performance Test System (APTS)-Simple Reaction Time                          | 1   |
| Useful Field of View (UFOV)                                                            | 1   |
| Automated Performance Test System (APTS)-Sternberg Test                                | 1   |
| Visual Association Test                                                                | 1   |
| Total of 50 tests                                                                      | 353 |

## Executive Function

|                                                                                                      |    |
|------------------------------------------------------------------------------------------------------|----|
| Trail Making Test (TMT) - B                                                                          | 67 |
| Stroop Test - Interference (Color - Word Card; Card 3)                                               | 26 |
| Controlled Oral Word Association (COWA)                                                              | 25 |
| Digit Symbol                                                                                         | 16 |
| Similarities                                                                                         | 14 |
| Verbal Fluency Test                                                                                  | 10 |
| Wisconsin Card Sort Test (WCST)                                                                      | 9  |
| Regensburg Word Fluency Test (RWT)                                                                   | 6  |
| Booklet Category Test                                                                                | 5  |
| Digit Span - Backwards                                                                               | 4  |
| D2 Test                                                                                              | 3  |
| High Sensitivity Cognitive Screen (HSCS) - Self Regulation and Planning                              | 3  |
| Intradimensional/Extradimensional Shift Task (IED)                                                   | 3  |
| Consonant Trigrams Test                                                                              | 2  |
| Grooved Peg Board - Left or Non-Dominant Hand                                                        | 2  |
| Memory Scanning Test (MST)                                                                           | 2  |
| Paced Auditory Serial Addition Test (PASAT)                                                          | 2  |
| Finger Tapping Test: Left or Non-Dominant Hand                                                       | 2  |
| Leistungsprüfsystem (LPS) - Achievement Measure System                                               | 2  |
| Grooved Peg Board - Right or Dominant Hand                                                           | 2  |
| Finger Tapping Test: Right or Dominant Hand                                                          | 2  |
| Ruff 2 & 7 Selective Attention Test                                                                  | 1  |
| European Organization for Research and Treatment of Cancer-Questionnaire (EORTC) - General Cognition | 1  |
| Design Fluency                                                                                       | 1  |
| Cambridge Neuropsychological Test Automated Battery (CANTAB): The Stockings of Cambridge Task        | 1  |
| Thumb-Finger Sequence: Right Hand                                                                    | 1  |
| Dementia Rating Scale (DRS) - Conceptualization                                                      | 1  |
| Test of Attentional Performance (TAP) - Go/No Go                                                     | 1  |
| Dementia Rating Scale (DRS) - Initiation and Preservation                                            | 1  |

|                                                                                      |     |
|--------------------------------------------------------------------------------------|-----|
| Thumb-Finger Sequence: Left Hand                                                     | 1   |
| Total of 30 tests                                                                    | 216 |
| Processing speed                                                                     |     |
| Digit Symbol                                                                         | 28  |
| Fepsy Visual Reaction - Dominant                                                     | 9   |
| Fepsy Visual Reaction - Non-Dominant                                                 | 9   |
| Trail Making Test (TMT) - A                                                          | 9   |
| Fepsy Binary Choice                                                                  | 8   |
| Fepsy Visual Searching                                                               | 6   |
| Symbol Search                                                                        | 5   |
| Letter Cancellation Task                                                             | 3   |
| California Computerized Assessment Package (CalCAP) - Accuracy                       | 1   |
| Test of Attentional Performance (TAP) - Simple Reaction Time                         | 1   |
| Computer Drug Research System (CDRS)                                                 | 2   |
| D2 Test                                                                              | 2   |
| Letter Digit Substitution Test                                                       | 1   |
| Complex Reaction Time Task                                                           | 1   |
| Paced Auditory Serial Addition Test (PASAT)                                          | 1   |
| California Computerized Assessment Package (CalCAP) - Complex Choice Reaction Time   | 1   |
| Bourdon-Wiersma Dot Cancellation Test                                                | 1   |
| California Computerized Assessment Package (CalCAP) - Simple Reaction Time           | 1   |
| Monroe-Sherman Reading Comprehension                                                 | 1   |
| Additive Factor Model                                                                | 1   |
| Ruff 2 & 7 Selective Attention Test                                                  | 1   |
| Cambridge Neuropsychological Test Automated Battery (CANTAB): The Reaction Time Test | 1   |
| Automated Performance Test System (APTS)-Code Substitution                           | 1   |
| CNS-Vital Signs - Processing Speed                                                   | 1   |
| CNS-Vital Signs - Reaction Time                                                      | 1   |

|                                                                                                      |    |
|------------------------------------------------------------------------------------------------------|----|
| Zazzo's Attention Test - Speed                                                                       | 1  |
| Total of 26 tests                                                                                    | 97 |
| Short-Term Memory                                                                                    |    |
| Visual Reproduction - I                                                                              | 11 |
| Rey Auditory Verbal Learning Test (RAVLT) - Immediate Recall                                         | 10 |
| Letter Number Sequencing                                                                             | 9  |
| California Verbal Learning Test (CVLT) - Immediate Recall                                            | 8  |
| Logical Memory - I                                                                                   | 6  |
| Rey Complex Figure Test (RCFT) - Immediate Recall                                                    | 6  |
| Benton Visual Retention Test                                                                         | 3  |
| California Verbal Learning Test (CVLT) - Short-delay Recall                                          | 3  |
| 4-Word Short Term Memory (4WSTM)                                                                     | 3  |
| Rey Auditory Verbal Learning Test (RAVLT) - Total Learning (1-5 Trials)                              | 2  |
| Hopkins Verbal Learning Test Revised (HVLT-R) - Immediate                                            | 2  |
| Repeatable Battery for the Assessment of Neuropsychological Status (RBANS) - Immediate Memory        | 2  |
| Brief Visuospatial Memory Test Revised (BVMT-R) - Total                                              | 1  |
| International study of postoperative cognitive dysfunction (ISPOCD): Letter Digit Coding Test (LDCT) | 1  |
| California Verbal Learning Test (CVLT) - List B                                                      | 1  |
| Letter Digit Substitution Test                                                                       | 1  |
| California Verbal Learning Test (CVLT) - Trials 1-5                                                  | 1  |
| CNS-Vital Signs - Visual Immediate Memory                                                            | 1  |
| CNS-Vital Signs - Verbal Immediate Memory                                                            | 1  |
| Auditory Consonant Trigrams Test                                                                     | 1  |
| Total of 20 tests                                                                                    | 73 |
| Language                                                                                             |    |
| Controlled Oral Word Association (COWA)                                                              | 21 |
| Verbal Fluency Test                                                                                  | 17 |
| Boston Naming Test                                                                                   | 15 |
| Vocabulary Subtest                                                                                   | 8  |



|                                                                                                  |    |
|--------------------------------------------------------------------------------------------------|----|
| Reading Subtest                                                                                  | 7  |
| Repeatable Battery for the Assessment of Neuropsychological Status (RBANS) - Language            | 4  |
| High Sensitivity Cognitive Screen (HSCS) - Language                                              | 3  |
| Similarities                                                                                     | 3  |
| Regensburg Word Fluency Test (RWT)                                                               | 2  |
| Coding                                                                                           | 2  |
| Total of 10 tests                                                                                | 82 |
| Long-Term Memory                                                                                 |    |
| Rey Auditory Verbal Learning Test (RAVLT) - Delayed Recall                                       | 14 |
| Rey Complex Figure Test (RCFT) - Delayed Recall                                                  | 12 |
| California Verbal Learning Test (CVLT) - Long-delay Recall                                       | 10 |
| Visual Reproduction - II                                                                         | 10 |
| Logical Memory - II                                                                              | 9  |
| Rey Auditory Verbal Learning Test (RAVLT) - Recognition                                          | 8  |
| California Verbal Learning Test (CVLT) - Recognition                                             | 6  |
| Family Pictures - II                                                                             | 3  |
| Visual Reproduction - Recognition                                                                | 3  |
| Hopkins Verbal Learning Test Revised (HVLT-R) - Delayed Recall                                   | 2  |
| International study of postoperative cognitive dysfunction (ISPOCD): Visual Verbal Learning Test | 2  |
| Benton Facial Recognition Test                                                                   | 2  |
| CNS-Vital Signs - Visual Delayed Memory                                                          | 1  |
| CNS-Vital Signs - Verbal Delayed Memory                                                          | 1  |
| Repeatable Battery for the Assessment of Neuropsychological Status (RBANS) - Delayed Memory      | 1  |
| Brief Visuospatial Memory Test Revised (BVMT-R) - Delayed                                        | 1  |
| Verbal Selective Reminding Test (VSRT)- Delayed Recall                                           | 1  |
| Verbal Selective Reminding Test (VSRT) - Long-Term Storage                                       | 1  |
| Nonverbal Selective Reminding Test (NVSRT) - Long-Term Storage                                   | 1  |
| Nonverbal Selective Reminding Test (NVSRT)- Delayed Recall                                       | 1  |
| Total of 20 tests                                                                                | 89 |

## Visuospatial Processing

|                                                                                                 |    |
|-------------------------------------------------------------------------------------------------|----|
| Block Design                                                                                    | 34 |
| Rey Complex Figure Test (RCFT) - Copy                                                           | 30 |
| Repeatable Battery for the Assessment of Neuropsychological Status (RBANS) - Visuospatial Skill | 4  |
| Matrix Reasoning                                                                                | 3  |
| High Sensitivity Cognitive Screen (HSCS) - Spatial                                              | 3  |
| Novel Image/Novel Location (NINL)                                                               | 1  |
| Facial Recognition                                                                              | 2  |
| Dementia Rating Scale (DRS) - Construction                                                      | 1  |
| Automated Performance Test System (APTS)-Pattern Comparison                                     | 1  |
| Design Organization Test                                                                        | 1  |
| Automated Performance Test System (APTS)-Manikin Test                                           | 1  |
| Road Map Sense of Direction Test                                                                | 1  |
| Total of 12 tests                                                                               | 83 |

## Motor Function

|                                                                                    |     |
|------------------------------------------------------------------------------------|-----|
| Finger Tapping Test: Left or Non-Dominant Hand                                     | 26  |
| Grooved Peg Board - Left or Non-Dominant Hand                                      | 26  |
| Finger Tapping Test: Right or Dominant Hand                                        | 26  |
| Grooved Peg Board - Right or Dominant Hand                                         | 25  |
| Thumb-Finger Sequence: Right Hand                                                  | 4   |
| Thumb-Finger Sequence: Left Hand                                                   | 4   |
| High Sensitivity Cognitive Screen (HSCS) - Psychomotor                             | 2   |
| Finger Tapping Test: Both Hands                                                    | 1   |
| California Computerized Assessment Package (CalCAP) - Simple Reaction Time         | 1   |
| California Computerized Assessment Package (CalCAP) - Complex Choice Reaction Time | 1   |
| Dementia Rating Scale (DRS) - Construction                                         | 1   |
| Fine-Motoric Test                                                                  | 1   |
| Grooved Peg Board - Both Hands                                                     | 1   |
| Total of 13 tests                                                                  | 119 |

## Memory

|                                                                         |     |
|-------------------------------------------------------------------------|-----|
| Logical Memory - II                                                     | 9   |
| Rey Auditory Verbal Learning Test (RAVLT) - Delayed Recall              | 9   |
| Rey Complex Figure Test (RCFT) - Delayed Recall                         | 8   |
| California Verbal Learning Test (CVLT) - Long-delay Recall              | 7   |
| Rey Auditory Verbal Learning Test (RAVLT) - Total Learning (1-5 Trials) | 7   |
| Logical Memory - I                                                      | 7   |
| Rey Complex Figure Test (RCFT) - Immediate Recall                       | 7   |
| California Verbal Learning Test (CVLT) - Immediate Recall               | 6   |
| Rey Auditory Verbal Learning Test (RAVLT) - Recognition                 | 6   |
| Visual Reproduction - II                                                | 6   |
| California Verbal Learning Test (CVLT) - Short-delay Recall             | 5   |
| Rey Auditory Verbal Learning Test (RAVLT) - Immediate Recall            | 5   |
| California Verbal Learning Test (CVLT) - Recognition                    | 4   |
| Visual Reproduction - I                                                 | 6   |
| 4-Word Short Term Memory (4WSTM)                                        | 3   |
| Family Pictures - II                                                    | 2   |
| Rey Complex Figure Test (RCFT) - Recognition                            | 2   |
| California Verbal Learning Test (CVLT) - List B                         | 2   |
| Consonant Trigrams Test                                                 | 2   |
| Trail Making Test (TMT) - B                                             | 1   |
| Rey Auditory Verbal Learning Test (RAVLT) - Interference                | 1   |
| Benton Visual Retention Test                                            | 1   |
| California Verbal Learning Test (CVLT) - Trials 1-5                     | 1   |
| Trail Making Test (TMT) - A                                             | 1   |
| Verbal Selective Reminding Test (VSRT)- Delayed Recall                  | 2   |
| Verbal Selective Reminding Test (VSRT) - Long-Term Storage              | 1   |
| Verbal Selective Reminding Test (VSRT) - Consistent Long-Term Retrieval | 1   |
| Nonverbal Selective Reminding Test (NVSRT) - Long-Term Storage          | 1   |
| Nonverbal Selective Reminding Test (NVSRT)- Delayed Recall              | 1   |
| Total of 29 tests                                                       | 114 |

Verbal Memory

|                                                                                               |    |
|-----------------------------------------------------------------------------------------------|----|
| Rey Auditory Verbal Learning Test (RAVLT) - Delayed Recall                                    | 11 |
| California Verbal Learning Test (CVLT) - Long-delay Recall                                    | 9  |
| Rey Auditory Verbal Learning Test (RAVLT) - Total Learning (1-5 Trials)                       | 9  |
| Logical Memory - II                                                                           | 8  |
| Rey Auditory Verbal Learning Test (RAVLT) - Recognition                                       | 8  |
| Logical Memory - I                                                                            | 6  |
| California Verbal Learning Test (CVLT) - Short-delay Recall                                   | 5  |
| California Verbal Learning Test (CVLT) - Recognition                                          | 5  |
| California Verbal Learning Test (CVLT) - Immediate Recall                                     | 5  |
| Hopkins Verbal Learning Test Revised (HVLT-R) - Immediate                                     | 3  |
| California Verbal Learning Test (CVLT) - Trials 1-5                                           | 3  |
| High Sensitivity Cognitive Screen (HSCS) - Memory                                             | 3  |
| 4-Word Short Term Memory (4WSTM)                                                              | 3  |
| Dementia Rating Scale (DRS) - Memory                                                          | 2  |
| Rey Auditory Verbal Learning Test (RAVLT) - Immediate Recall                                  | 2  |
| Hopkins Verbal Learning Test Revised (HVLT-R) - Delayed Recall                                | 2  |
| California Verbal Learning Test (CVLT) - Learning Speed                                       | 2  |
| Rey Auditory Verbal Learning Test (RAVLT) - Interference                                      | 2  |
| Verbal Memory Index (WMS-R)                                                                   | 2  |
| California Verbal Learning Test (CVLT) - Consolidation                                        | 1  |
| Rey Auditory Verbal Learning Test (RAVLT) - Delta                                             | 1  |
| Repeatable Battery for the Assessment of Neuropsychological Status (RBANS) - Immediate Memory | 1  |
| California Verbal Learning Test (CVLT)                                                        | 1  |
| Concept Shifting Test (CST)-B                                                                 | 1  |
| Concept Shifting Test (CST)-A                                                                 | 1  |
| Hopkins Verbal Learning Test Revised (HVLT-R) - Recognition                                   | 1  |
| Warrington Recognition Memory Test (RMT)- words                                               | 1  |
| Verbal Selective Reminding (VSRT) - Verbal Learning                                           | 3  |
| Verbal Selective Reminding Test (VSRT)- Delayed Recall                                        | 6  |
| Verbal Selective Reminding Test (VSRT) - Long-Term Storage                                    | 5  |

|                                                                         |     |
|-------------------------------------------------------------------------|-----|
| Verbal Selective Reminding Test (VSRT) - Consistent Long-Term Retrieval | 3   |
| Total of 31 tests                                                       | 115 |
| Visual Memory                                                           |     |
| Rey Complex Figure Test (RCFT) - Immediate Recall                       | 10  |
| Rey Complex Figure Test (RCFT) - Delayed Recall                         | 10  |
| Benton Visual Retention Test                                            | 10  |
| Visual Reproduction - II                                                | 10  |
| Visual Reproduction - I                                                 | 10  |
| Visual Memory Index (WMS-R)                                             | 2   |
| Visual Reproduction - Recognition                                       | 2   |
| Family Pictures - II                                                    | 1   |
| Benton Facial Recognition Test                                          | 1   |
| Warrington Recognition Memory Test (RMT)- faces                         | 1   |
| Nonverbal Selective Reminding Test (NVSRT) - Long-Term Storage          | 1   |
| Nonverbal Selective Reminding Test (NVSRT)- Delayed Recall              | 1   |
| Total of 12 tests                                                       | 59  |
| Working Memory                                                          |     |
| Stroop Test - Interference (Color - Word Card; Card 3)                  | 3   |
| Trail Making Test (TMT) - B                                             | 3   |
| Digit Span - Backwards                                                  | 3   |
| Arithmetic                                                              | 1   |
| Paced Auditory Serial Addition Test (PASAT)                             | 1   |
| Total of 5 tests                                                        | 11  |
| Concept Formation and Reasoning                                         |     |
| Arithmetic                                                              | 5   |
| Wisconsin Card Sort Test (WCST)                                         | 3   |
| Total of 2 tests                                                        | 8   |
| Perception                                                              |     |
| Benton Facial Recognition Test                                          | 1   |
| Letter Cancellation Task                                                | 1   |
| Total of 2 test                                                         | 2   |

---
